# Supplementary material for: Integrins αvβ3 and αvβ5 as prognostic, diagnostic, and therapeutic targets in gastric cancer
Source: Springer Nature journal article supplement (doi:10.1007/s10120-014-0435-2), 2014-10-14
Supplement: MOESM1 [file 8741808]

**Supplemental Table 1 Correlation between integrin expression in intestinal type gastric cancer and clinico-pathological patient characteristics**

| Intestinal Phenotype       |   |   | $\alpha v \beta 3$            |                               |                               |                               |                             |                               | $\alpha v \beta 5$            |                               |                               |                               |                               |                               |
|----------------------------|---|---|-------------------------------|-------------------------------|-------------------------------|-------------------------------|-----------------------------|-------------------------------|-------------------------------|-------------------------------|-------------------------------|-------------------------------|-------------------------------|-------------------------------|
|                            |   |   | Tumor Cells                   |                               | Stroma Cells                  |                               | Endothelium                 |                               | Tumor Cells                   |                               | Stroma Cells                  |                               | Endothelium                   |                               |
|                            |   |   | Negative<br>[n (%)]           | Positive<br>[n (%)]           | Negative<br>[n (%)]           | Positive<br>[n (%)]           | Negative<br>[n (%)]         | Positive<br>[n (%)]           | Negative<br>[n (%)]           | Positive<br>[n (%)]           | Negative<br>[n (%)]           | Positive<br>[n (%)]           | Negative<br>[n (%)]           | Positive<br>[n (%)]           |
| <b>Gender</b>              | n | p | 233                           | 0.764                         | 233                           | 1.000                         | 232                         | 0.543                         | 234                           | 0.882                         | 234                           | <b>0.029</b>                  | 171                           | 0.438                         |
| Men                        |   |   | 108 (65.9)                    | 56 (34.1)                     | 62 (37.8)                     | 102 (62.2)                    | 25 (15.2)                   | 139 (84.8)                    | 58 (35.2)                     | 107 (64.8)                    | 62 (37.6)                     | 103 (62.4)                    | 32 (26.7)                     | 88 (73.3)                     |
| Women                      |   |   | 47 (68.1)                     | 22 (31.9)                     | 26 (37.7)                     | 43 (62.3)                     | 8 (11.8)                    | 60 (88.2)                     | 25 (36.2)                     | 44 (63.8)                     | 37 (53.6)                     | 32 (46.4)                     | 10 (19.6)                     | 41 (80.4)                     |
| <b>Localization</b>        | n | p | 232                           | 0.889                         | 233                           | 0.340                         | 232                         | 0.572                         | 234                           | 0.053                         | 234                           | 0.141                         | 171                           | 0.151                         |
| Proximal stomach           |   |   | 47 (48.9)                     | 49 (51.0)                     | 33 (34.0)                     | 64 (66.0)                     | 12 (12.5)                   | 84 (87.5)                     | 27 (28.1)                     | 69 (71.9)                     | 35 (36.5)                     | 61 (63.5)                     | 13 (18.6)                     | 57 (81.4)                     |
| Distal stomach             |   |   | 65 (47.8)                     | 71 (52.2)                     | 55 (40.4)                     | 81 (59.6)                     | 21 (15.4)                   | 115 (84.6)                    | 56 (40.6)                     | 82 (59.4)                     | 64 (46.4)                     | 74 (53.6)                     | 29 (28.7)                     | 72 (71.3)                     |
| <b>pT-category</b>         | n | p | 233                           | 0.745                         | 233                           | 0.224                         | 232                         | 0.230                         | 234                           | 0.455                         | 234                           | <b>0.043</b>                  | 171                           | 0.689                         |
| pT1a                       |   |   | 2 (50.0)                      | 2 (50.0)                      | 0 (0.00)                      | 4 (100)                       | 0 (0.0)                     | 4 (100)                       | 2 (50.0)                      | 2 (50.0)                      | 4 (100.0)                     | 0 (0.0)                       | 1 (25.0)                      | 3 (75.0)                      |
| pT1b                       |   |   | 23 (67.6)                     | 11 (32.4)                     | 8 (23.5)                      | 26 (76.5)                     | 1 (2.9)                     | 33 (97.1)                     | 13 (37.1)                     | 22 (62.9)                     | 21 (60.0)                     | 14 (40.0)                     | 10 (35.7)                     | 18 (64.3)                     |
| pT2                        |   |   | 22 (64.7)                     | 12 (35.3)                     | 13 (38.2)                     | 21 (71.8)                     | 5 (14.7)                    | 29 (85.3)                     | 10 (31.3)                     | 22 (68.8)                     | 11 (34.4)                     | 21 (65.6)                     | 4 (19.0)                      | 17 (81.0)                     |
| pT3                        |   |   | 61 (62.9)                     | 36 (37.1)                     | 38 (39.2)                     | 59 (60.8)                     | 14 (14.6)                   | 82 (85.4)                     | 36 (37.1)                     | 61 (62.9)                     | 38 (39.2)                     | 59 (60.8)                     | 15 (22.7)                     | 51 (77.3)                     |
| pT4a                       |   |   | 40 (74.1)                     | 14 (25.9)                     | 25 (46.3)                     | 29 (53.7)                     | 11 (20.4)                   | 43 (79.6)                     | 16 (28.6)                     | 40 (71.4)                     | 21 (37.5)                     | 35 (62.5)                     | 11 (25.6)                     | 32 (74.4)                     |
| pT4b                       |   |   | 7 (70.0)                      | 3 (30.0)                      | 4 (40.0)                      | 6 (60.0)                      | 2 (20.0)                    | 8 (80.0)                      | 6 (60.0)                      | 4 (40.0)                      | 4 (40.0)                      | 6 (60.0)                      | 1 (11.1)                      | 8 (88.9)                      |
| <b>pN-category</b>         | n | p | 230                           | 0.654                         | 230                           | 0.548                         | 230                         | 0.846                         | 230                           | 0.400                         | 230                           | 0.074                         | 167                           | 0.826                         |
| pN0                        |   |   | 53 (66.3)                     | 27 (33.7)                     | 27 (38.6)                     | 53 (61.4)                     | 8 (10.1)                    | 71 (89.9)                     | 30 (38.0)                     | 49 (62.0)                     | 41 (51.9)                     | 38 (48.1)                     | 15 (22.2)                     | 41 (77.8)                     |
| pN1                        |   |   | 24 (68.6)                     | 11 (31.4)                     | 15 (42.9)                     | 20 (67.1)                     | 5 (14.3)                    | 30 (85.7)                     | 13 (37.1)                     | 22 (62.9)                     | 14 (40.0)                     | 21 (60.0)                     | 8 (28.0)                      | 15 (72.0)                     |
| pN2                        |   |   | 28 (71.8)                     | 11 (28.2)                     | 17 (43.6)                     | 22 (56.4)                     | 7 (17.9)                    | 32 (82.1)                     | 18 (46.2)                     | 21 (53.8)                     | 15 (38.5)                     | 24 (61.5)                     | 4 (14.8)                      | 23 (85.2)                     |
| pN3 (a/b)                  |   |   | 36 (63.2)                     | 19 (26.8)                     | 33 (50.8)                     | 32 (49.2)                     | 13 (17.1)                   | 63 (82.9)                     | 22 (28.6)                     | 55 (71.4)                     | 25 (32.5)                     | 52 (67.5)                     | 15 (25.0)                     | 45 (75.0)                     |
| <b>Stage (UICC)</b>        | n | p | 229                           | 0.705                         | 229                           | 0.160                         | 229                         | 0.475                         | 229                           | 0.723                         | 229                           | 0.111                         | 167                           | 0.515                         |
| IA                         |   |   | 19 (61.3)                     | 12 (28.7)                     | 7 (22.6)                      | 24 (77.4)                     | 1 (3.2)                     | 30 (96.7)                     | 14 (43.8)                     | 18 (56.2)                     | 21 (65.6)                     | 11 (34.4)                     | 10 (38.5)                     | 16 (61.5)                     |
| IB                         |   |   | 17 (77.3)                     | 5 (22.7)                      | 6 (27.3)                      | 16 (72.7)                     | 2 (4.5)                     | 20 (90.9)                     | 7 (35.0)                      | 13 (65.0)                     | 11 (55.0)                     | 9 (45.0)                      | 2 (15.4)                      | 11 (84.6)                     |
| IIA                        |   |   | 22 (66.7)                     | 11 (33.3)                     | 14 (41.2)                     | 19 (58.8)                     | 4 (12.5)                    | 28 (87.5)                     | 12 (36.4)                     | 21 (63.6)                     | 12 (36.4)                     | 21 (63.6)                     | 3 (14.3)                      | 18 (85.7)                     |
| IIB                        |   |   | 11 (50.0)                     | 11 (50.0)                     | 11 (50.0)                     | 11 (50.0)                     | 4 (18.2)                    | 18 (81.8)                     | 8 (36.4)                      | 14 (63.6)                     | 8 (36.4)                      | 14 (63.6)                     | 4 (33.3)                      | 8 (66.7)                      |
| IIIA                       |   |   | 19 (70.4)                     | 8 (29.6)                      | 15 (55.5)                     | 12 (45.5)                     | 4 (14.8)                    | 23 (85.2)                     | 12 (44.4)                     | 15 (55.6)                     | 11 (29.7)                     | 16 (70.3)                     | 5 (25.0)                      | 15 (75.0)                     |
| IIIB                       |   |   | 26 (66.7)                     | 13 (33.3)                     | 11 (39.5)                     | 28 (60.5)                     | 6 (15.4)                    | 33 (84.6)                     | 14 (46.7)                     | 16 (53.3)                     | 16 (40.0)                     | 24 (60.0)                     | 8 (24.2)                      | 25 (75.8)                     |
| IIIC                       |   |   | 17 (68.0)                     | 8 (32.0)                      | 11 (44.0)                     | 14 (66.0)                     | 5 (20.0)                    | 20 (80.0)                     | 7 (28.0)                      | 18 (72.0)                     | 8 (32.0)                      | 17 (68.0)                     | 6 (33.3)                      | 12 (66.7)                     |
| IV                         |   |   | 22 (73.3)                     | 8 (26.7)                      | 12 (40.0)                     | 18 (60.0)                     | 7 (23.3)                    | 23 (76.7)                     | 9 (30.0)                      | 21 (70.0)                     | 9 (30.0)                      | 21 (70.0)                     | 4 (16.7)                      | 20 (83.3)                     |
| <b>"Kiel"-Stage</b>        | n | p | 232                           | 0.849                         | 232                           | 0.449                         | 231                         | 0.176                         | 232                           | 0.751                         | 232                           | <b>0.026</b>                  | 169                           | 0.274                         |
| I                          |   |   | 19 (61.3)                     | 12 (28.7)                     | 7 (22.6)                      | 24 (77.4)                     | 1 (3.2)                     | 30 (96.7)                     | 14 (43.8)                     | 18 (56.2)                     | 21 (65.6)                     | 11 (34.4)                     | 10 (38.5)                     | 16 (61.5)                     |
| II                         |   |   | 33 (67.3)                     | 16 (32.7)                     | 20 (40.8)                     | 29 (59.2)                     | 6 (12.5)                    | 42 (87.5)                     | 16 (34.0)                     | 31 (66.0)                     | 21 (36.8)                     | 26 (63.2)                     | 4 (13.3)                      | 26 (86.7)                     |
| IIIA                       |   |   | 17 (62.9)                     | 10 (37.1)                     | 11 (40.7)                     | 16 (59.3)                     | 3 (11.1)                    | 24 (88.9)                     | 10 (37.0)                     | 17 (63.0)                     | 10 (37.0)                     | 17 (63.0)                     | 5 (31.3)                      | 11 (68.7)                     |
| IIIB                       |   |   | 47 (66.2)                     | 24 (33.8)                     | 28 (39.4)                     | 43 (60.6)                     | 11 (15.5)                   | 60 (85.5)                     | 27 (37.5)                     | 45 (62.5)                     | 29 (40.3)                     | 43 (59.7)                     | 13 (23.6)                     | 42 (76.4)                     |
| IV                         |   |   | 39 (72.2)                     | 15 (27.8)                     | 22 (40.7)                     | 32 (59.3)                     | 12 (22.2)                   | 42 (77.8)                     | 16 (29.6)                     | 38 (70.4)                     | 16 (29.6)                     | 38 (79.4)                     | 10 (23.8)                     | 32 (76.2)                     |
| <b>Lymphatic invasion</b>  | n | p | 226                           | 0.676                         | 226                           | 0.053                         | 225                         | 0.333                         | 226                           | 0.577                         | 226                           | 0.500                         | 165                           | 0.717                         |
| pL0                        |   |   | 75 (64.1)                     | 42 (35.9)                     | 49 (41.9)                     | 68 (58.1)                     | 13 (11.2)                   | 103 (88.8)                    | 44 (37.0)                     | 75 (63.0)                     | 53 (44.5)                     | 66 (55.5)                     | 22 (25.9)                     | 63 (74.1)                     |
| pL1                        |   |   | 73 (66.9)                     | 36 (33.1)                     | 32 (29.4)                     | 77 (70.6)                     | 18 (16.5)                   | 91 (83.5)                     | 35 (32.7)                     | 72 (67.3)                     | 42 (39.3)                     | 65 (60.7)                     | 18 (22.5)                     | 62 (77.5)                     |
| <b>Venous invasion</b>     | n | p | 225                           | 0.827                         | 225                           | 0.666                         | 224                         | 0.373                         | 225                           | <b>0.029</b>                  | 225                           | 0.213                         | 164                           | 0.164                         |
| pV0                        |   |   | 130 (65.3)                    | 69 (34.7)                     | 73 (36.7)                     | 126 (63.3)                    | 26 (13.1)                   | 172 (86.9)                    | 74 (37.2)                     | 125 (62.8)                    | 81 (40.7)                     | 118 (59.3)                    | 37 (25.7)                     | 107 (74.3)                    |
| pV1                        |   |   | 18 (69.2)                     | 8 (30.8)                      | 8 (30.7)                      | 18 (69.3)                     | 5 (19.2)                    | 21 (80.8)                     | 4 (15.4)                      | 22 (84.6)                     | 14 (53.8)                     | 12 (46.2)                     | 2 (10.0)                      | 18 (90.0)                     |
| <b>Tumor grade</b>         | n | p | 225                           | 1.000                         | 225                           | 1.000                         | 225                         | <b>0.027</b>                  | 226                           | 0.402                         | 226                           | 0.587                         | 165                           | 0.719                         |
| G1 / G2                    |   |   | 64 (65.3)                     | 34 (34.7)                     | 37 (37.8)                     | 61 (62.2)                     | 7 (7.1)                     | 91 (92.9)                     | 39 (39.8)                     | 59 (60.2)                     | 43 (43.9)                     | 55 (56.1)                     | 19 (27.1)                     | 51 (72.9)                     |
| G3 / G4                    |   |   | 84 (66.1)                     | 43 (33.9)                     | 47 (36.7)                     | 80 (63.3)                     | 22 (17.3)                   | 105 (82.7)                    | 43 (33.6)                     | 85 (66.4)                     | 51 (39.8)                     | 77 (60.2)                     | 23 (24.2)                     | 72 (75.8)                     |
| <b>Survival</b>            | n | p | 226                           | 0.182                         | 226                           | 0.332                         | 225                         | <b>0.030</b>                  | 227                           | 0.875                         | 227                           | <b>0.005</b>                  | 166                           | 0.901                         |
| median $\pm$ SD<br>[95%CI] |   |   | 15.6 $\pm$ 2.1<br>[11.5-19.8] | 22.4 $\pm$ 5.3<br>[12.0-32.7] | 22.6 $\pm$ 3.1<br>[16.6-28.6] | 14.7 $\pm$ 2.0<br>[10.7-18.6] | 8.6 $\pm$ 5.9<br>[0.0-20.1] | 17.9 $\pm$ 2.1<br>[13.7-22.1] | 15.6 $\pm$ 2.1<br>[11.5-19.8] | 17.9 $\pm$ 2.7<br>[12.7-23.2] | 27.1 $\pm$ 7.4<br>[12.5-41.6] | 13.4 $\pm$ 1.4<br>[10.7-16.1] | 17.9 $\pm$ 3.2<br>[11.6-24.3] | 15.4 $\pm$ 2.5<br>[10.5-20.3] |

"n" denotes numbers of patients. "p" denotes p-value. "SD" denotes standard deviation.

p-values printed in bold denote statistically significant correlations.
