# Supplementary material for: Integrins αvβ3 and αvβ5 as prognostic, diagnostic, and therapeutic targets in gastric cancer
Source: Springer Nature journal article supplement (doi:10.1007/s10120-014-0435-2), 2014-10-14
Supplement: MOESM2 [file 8741808]

**Supplemental Table 2 Correlation between integrin expression in diffuse type gastric cancer and clinico-pathological patient characteristics**

| Diffuse Phenotype          |   |   | $\alpha v \beta 3$           |                               |                              |                               |                              |                               | $\alpha v \beta 5$           |                               |                               |                              |                              |                              |
|----------------------------|---|---|------------------------------|-------------------------------|------------------------------|-------------------------------|------------------------------|-------------------------------|------------------------------|-------------------------------|-------------------------------|------------------------------|------------------------------|------------------------------|
|                            |   |   | Tumor Cells                  |                               | Stroma Cells                 |                               | Endothelium                  |                               | Tumor Cells                  |                               | Stroma Cells                  |                              | Endothelium                  |                              |
|                            | n | p | Negative<br>[n (%)]          | Positive<br>[n (%)]           | Negative<br>[n (%)]          | Positive<br>[n (%)]           | Negative<br>[n (%)]          | Positive<br>[n (%)]           | Negative<br>[n (%)]          | Positive<br>[n (%)]           | Negative<br>[n (%)]           | Positive<br>[n (%)]          | Negative<br>[n (%)]          | Positive<br>[n (%)]          |
| <b>Gender</b>              | n | p | 144                          | 1.000                         | 144                          | 1.000                         | 144                          | 0.854                         | 140                          | 1.000                         | 141                           | 0.360                        | 33                           | 0.686                        |
| Men                        |   |   | 50 (82.0)                    | 11 (18.0)                     | 34 (55.7)                    | 27 (44.3)                     | 17 (27.9)                    | 44 (72.1)                     | 36 (61.0)                    | 23 (39.0)                     | 48 (80.0)                     | 12 (20.0)                    | 7 (30.4)                     | 16 (69.6)                    |
| Women                      |   |   | 68 (81.9)                    | 15 (18.1)                     | 46 (55.4)                    | 37 (44.6)                     | 25 (30.1)                    | 58 (69.9)                     | 49 (60.5)                    | 32 (39.5)                     | 70 (86.4)                     | 11 (13.6)                    | 2 (20.0)                     | 8 (80.0)                     |
| <b>Localization</b>        | n | p | 144                          | 0.750                         | 144                          | 1.000                         | 144                          | 0.589                         | 140                          | 0.458                         | 141                           | 0.198                        | 33                           | 1.000                        |
| Proximal stomach           |   |   | 15 (78.9)                    | 4 (21.1)                      | 11 (57.9)                    | 8 (42.1)                      | 4 (21.1)                     | 15 (78.9)                     | 10 (52.6)                    | 9 (47.4)                      | 14 (73.7)                     | 5 (26.3)                     | 3 (30.0)                     | 57 (70.0)                    |
| Distal stomach             |   |   | 103 (82.4)                   | 22 (17.6)                     | 69 (55.2)                    | 56 (44.8)                     | 38 (30.4)                    | 87 (69.6)                     | 75 (62.0)                    | 46 (38.0)                     | 104 (85.2)                    | 18 (14.8)                    | 6 (26.1)                     | 17 (73.9)                    |
| <b>pT-category</b>         | n | p | 144                          | 0.432                         | 144                          | 0.501                         | 144                          | 0.474                         | 140                          | 0.539                         | 141                           | 0.265                        | 33                           | 0.524                        |
| pT1a                       |   |   | 6 (85.7)                     | 1 (14.3)                      | 3 (42.9)                     | 4 (57.1)                      | 1 (14.3)                     | 6 (85.7)                      | 2 (66.7)                     | 1 (33.3)                      | 4 (100.0)                     | 0 (0.0)                      | 0 (0.00)                     | 0 (0.00)                     |
| pT1b                       |   |   | 4 (80.0)                     | 1 (20.0)                      | 1 (20.0)                     | 4 (80.0)                      | 1 (20.0)                     | 4 (80.0)                      | 2 (33.3)                     | 4 (66.7)                      | 5 (83.3)                      | 1 (16.7)                     | 0 (0.00)                     | 0 (0.00)                     |
| pT2                        |   |   | 12 (100)                     | 0 (0.00)                      | 6 (50.0)                     | 6 (50.0)                      | 3 (25.0)                     | 9 (75.0)                      | 7 (63.6)                     | 4 (36.4)                      | 9 (81.8)                      | 2 (18.2)                     | 2 (33.3)                     | 4 (66.7)                     |
| pT3                        |   |   | 45 (83.3)                    | 9 (16.7)                      | 30 (55.6)                    | 24 (44.4)                     | 13 (24.1)                    | 41 (75.9)                     | 30 (55.6)                    | 24 (44.4)                     | 44 (81.5)                     | 10 (18.5)                    | 5 (31.3)                     | 11 (68.7)                    |
| pT4a                       |   |   | 35 (74.5)                    | 12 (25.5)                     | 27 (57.4)                    | 20 (42.6)                     | 15 (31.9)                    | 32 (68.1)                     | 30 (63.8)                    | 17 (36.2)                     | 37 (78.7)                     | 10 (21.3)                    | 1 (11.1)                     | 8 (88.9)                     |
| pT4b                       |   |   | 16 (84.2)                    | 3 (15.8)                      | 13 (68.4)                    | 6 (31.6)                      | 9 (47.4)                     | 10 (52.6)                     | 14 (73.7)                    | 5 (26.3)                      | 19 (100)                      | 0 (0.00)                     | 1 (50.0)                     | 8 (50.0)                     |
| <b>pN-category</b>         | n | p | 142                          | 0.630                         | 142                          | 0.283                         | 142                          | 0.617                         | 138                          | 0.266                         | 139                           | 0.832                        | 31                           | 0.368                        |
| pN0                        |   |   | 27 (87.1)                    | 4 (22.9)                      | 14 (45.2)                    | 17 (54.8)                     | 7 (22.6)                     | 24 (77.4)                     | 13 (43.3)                    | 17 (56.7)                     | 23 (76.7)                     | 7 (23.3)                     | 1 (10.0)                     | 9 (90.0)                     |
| pN1                        |   |   | 19 (86.4)                    | 3 (13.6)                      | 14 (63.6)                    | 8 (36.4)                      | 7 (31.8)                     | 15 (68.2)                     | 16 (76.2)                    | 5 (23.8)                      | 20 (90.9)                     | 2 (9.1)                      | 1 (16.7)                     | 5 (83.3)                     |
| pN2                        |   |   | 18 (72.0)                    | 7 (28.0)                      | 13 (52.0)                    | 12 (48.0)                     | 8 (32.0)                     | 17 (68.0)                     | 17 (70.8)                    | 7 (29.2)                      | 21 (87.5)                     | 3 (12.5)                     | 3 (42.9)                     | 4 (57.1)                     |
| pN3 (a/b)                  |   |   | 52 (81.3)                    | 12 (18.7)                     | 37 (57.8)                    | 27 (42.2)                     | 19 (29.7)                    | 45 (70.3)                     | 37 (58.7)                    | 26 (41.3)                     | 52 (82.5)                     | 11 (17.5)                    | 3 (37.5)                     | 5 (62.5)                     |
| <b>Stage (UICC)</b>        | n | p | 144                          | 0.654                         | 144                          | 0.420                         | 144                          | 0.473                         | 140                          | 0.803                         | 141                           | 0.492                        | 30                           | 0.569                        |
| IA                         |   |   | 8 (80.0)                     | 2 (20.0)                      | 3 (30.0)                     | 7 (70.0)                      | 2 (20.0)                     | 8 (80.0)                      | 4 (44.4)                     | 5 (56.6)                      | 8 (88.9)                      | 1 (11.1)                     | 0 (0.00)                     | 0 (0.00)                     |
| IB                         |   |   | 6 (100)                      | 0 (0.00)                      | 3 (50.0)                     | 3 (50.0)                      | 0 (0.00)                     | 6 (100)                       | 2 (40.0)                     | 3 (60.0)                      | 4 (66.7)                      | 2 (33.3)                     | 1 (33.3)                     | 2 (66.7)                     |
| IIA                        |   |   | 13 (92.9)                    | 1 (7.1)                       | 8 (57.1)                     | 6 (42.9)                      | 5 (35.7)                     | 9 (64.3)                      | 7 (54.8)                     | 6 (46.2)                      | 11 (84.6)                     | 2 (15.4)                     | 0 (0.00)                     | 5 (100)                      |
| IIB                        |   |   | 11 (50.0)                    | 11 (50.0)                     | 8 (50.0)                     | 8 (50.0)                      | 2 (12.5)                     | 14 (87.5)                     | 10 (66.7)                    | 5 (33.3)                      | 11 (73.3)                     | 4 (26.7)                     | 2 (33.3)                     | 4 (66.7)                     |
| IIIA                       |   |   | 9 (75.0)                     | 3 (25.0)                      | 6 (50.0)                     | 6 (50.0)                      | 3 (25.0)                     | 9 (75.0)                      | 7 (58.3)                     | 5 (41.7)                      | 11 (91.7)                     | 1 (8.3)                      | 1 (33.3)                     | 2 (66.7)                     |
| IIIB                       |   |   | 23 (85.2)                    | 4 (14.8)                      | 15 (55.6)                    | 12 (44.4)                     | 9 (33.3)                     | 18 (66.7)                     | 16 (57.1)                    | 12 (42.9)                     | 21 (75.0)                     | 7 (25.0)                     | 3 (60.0)                     | 2 (30.0)                     |
| IIIC                       |   |   | 19 (70.4)                    | 8 (29.4)                      | 20 (74.1)                    | 7 (25.9)                      | 10 (37.0)                    | 17 (63.0)                     | 19 (70.4)                    | 8 (29.6)                      | 24 (88.9)                     | 3 (11.1)                     | 1 (33.3)                     | 2 (66.7)                     |
| IV                         |   |   | 26 (81.3)                    | 6 (18.7)                      | 17 (53.1)                    | 15 (46.9)                     | 11 (34.4)                    | 21 (65.6)                     | 20 (64.5)                    | 11 (35.5)                     | 28 (90.3)                     | 3 (9.7)                      | 1 (20.0)                     | 4 (80.0)                     |
| <b>"Kiel"-Stage</b>        | n | p | 144                          | 0.641                         | 144                          | 0.413                         | 144                          | 0.633                         | 140                          | 0.288                         | 141                           | 0.299                        | 33                           | 0.141                        |
| I                          |   |   | 8 (80.0)                     | 2 (20.0)                      | 3 (30.0)                     | 7 (70.0)                      | 2 (20.0)                     | 8 (80.0)                      | 4 (44.4)                     | 5 (56.6)                      | 8 (88.9)                      | 1 (11.1)                     | 0 (0.00)                     | 0 (0.00)                     |
| II                         |   |   | 17 (89.5)                    | 2 (10.5)                      | 9 (47.4)                     | 10 (52.6)                     | 3 (15.8)                     | 16 (84.2)                     | 8 (42.1)                     | 11 (57.9)                     | 13 (68.4)                     | 6 (31.6)                     | 1 (11.1)                     | 8 (88.9)                     |
| IIIA                       |   |   | 14 (93.3)                    | 1 (6.7)                       | 9 (60.0)                     | 6 (40.0)                      | 4 (26.7)                     | 11 (73.3)                     | 10 (71.4)                    | 4 (28.6)                      | 13 (86.7)                     | 2 (13.3)                     | 1 (14.3)                     | 6 (85.7)                     |
| IIIB                       |   |   | 35 (81.4)                    | 8 (18.6)                      | 24 (55.8)                    | 19 (44.2)                     | 14 (32.6)                    | 29 (67.4)                     | 26 (61.9)                    | 16 (38.1)                     | 34 (81.0)                     | 8 (19.0)                     | 6 (54.5)                     | 5 (45.5)                     |
| IV                         |   |   | 44 (77.2)                    | 13 (22.8)                     | 35 (61.4)                    | 22 (38.6)                     | 19 (33.3)                    | 38 (66.7)                     | 37 (66.1)                    | 19 (33.9)                     | 50 (89.3)                     | 6 (10.7)                     | 1 (14.3)                     | 6 (85.7)                     |
| <b>Lymphatic invasion</b>  | n | p | 140                          | 0.076                         | 140                          | 0.865                         | 140                          | 0.714                         | 136                          | 1.00                          | 137                           | 0.649                        | 32                           | 0.132                        |
| pL0                        |   |   | 56 (88.9)                    | 7 (11.1)                      | 34 (53.9)                    | 29 (46.1)                     | 20 (31.7)                    | 43 (68.3)                     | 36 (60.0)                    | 24 (40.0)                     | 52 (85.2)                     | 9 (14.8)                     | 3 (16.7)                     | 15 (83.3)                    |
| pL1                        |   |   | 59 (76.6)                    | 18 (23.4)                     | 43 (55.8)                    | 34 (44.2)                     | 22 (28.6)                    | 55 (71.4)                     | 46 (60.5)                    | 30 (39.5)                     | 62 (81.6)                     | 14 (18.4)                    | 6 (42.9)                     | 8 (57.1)                     |
| <b>Venous invasion</b>     | n | p | 140                          | 0.152                         | 140                          | 1.000                         | 140                          | 1.000                         | 136                          | 0.741                         | 137                           | 0.175                        | 32                           | 0.073                        |
| pV0                        |   |   | 110 (83.3)                   | 22 (16.7)                     | 73 (55.3)                    | 59 (44.7)                     | 40 (30.3)                    | 92 (69.7)                     | 77 (60.6)                    | 50 (39.4)                     | 108 (84.4)                    | 20 (15.6)                    | 7 (23.3)                     | 23 (76.7)                    |
| pV1                        |   |   | 5 (62.5)                     | 3 (37.5)                      | 4 (50.0)                     | 4 (50.0)                      | 2 (25.0)                     | 6 (75.0)                      | 5 (55.6)                     | 4 (44.4)                      | 6 (66.7)                      | 3 (33.3)                     | 2 (100)                      | 0 (0.00)                     |
| <b>Tumor grade</b>         | n | p | 141                          | 1.000                         | 141                          | 1.000                         | 141                          | 1.000                         | 137                          | 0.564                         | 138                           | 1.000                        | 32                           | n. c.                        |
| G1 / G2                    |   |   | 2 (100)                      | 0 (0.00)                      | 1 (50.0)                     | 1 (50.0)                      | 0 (0.00)                     | 2 (100)                       | 1 (33.3)                     | 2 (66.7)                      | 3 (100)                       | 0 (0.00)                     | 0 (0.00)                     | 0 (0.00)                     |
| G3 / G4                    |   |   | 113 (81.3)                   | 26 (18.7)                     | 77 (55.4)                    | 62 (44.6)                     | 40 (28.8)                    | 99 (71.2)                     | 81 (60.4)                    | 53 (39.6)                     | 112 (83.0)                    | 23 (17.0)                    | 9 (28.1)                     | 23 (71.9)                    |
| <b>Survival</b>            | n | p | 138                          | 0.731                         | 138                          | 0.519                         | 138                          | 0.435                         | 134                          | 0.539                         | 135                           | 0.229                        | 126                          | 0.928                        |
| median $\pm$ SD<br>[95%CI] |   |   | 12.9 $\pm$ 1.9<br>[9.2-16.7] | 17.5 $\pm$ 10.5<br>[0.0-38.1] | 12.5 $\pm$ 2.3<br>[8.4-17.3] | 15.5 $\pm$ 6.1<br>[10.7-18.6] | 11.8 $\pm$ 1.9<br>[7.9-15.5] | 15.5 $\pm$ 2.6<br>[10.5-20.5] | 12.8 $\pm$ 3.3<br>[6.3-19.4] | 14.2 $\pm$ 2.1<br>[10.1-18.2] | 14.2 $\pm$ 1.9<br>[10.4-17.9] | 10.6 $\pm$ 7.8<br>[0.0-25.8] | 17.1 $\pm$ 4.6<br>[8.0-26.1] | 14.1 $\pm$ 2.2<br>[9.7-18.5] |

"n" detones numbers of patients. "p" denotes p-value. "SD" denotes standard deviation.
