# Supplementary material for: Integrins αvβ3 and αvβ5 as prognostic, diagnostic, and therapeutic targets in gastric cancer
Source: Springer Nature journal article supplement (doi:10.1007/s10120-014-0435-2), 2014-10-14

## Online Resource 3 Evaluation and staining results of E-cadherin

### Evaluation of E-cadherin Immunostaining

The quantity and intensity of immunoreactivity of E-cadherin in tumor cells was evaluated by applying an immunoreactivity scoring system (IRS) that consists of two components. Category A documented the intensity of immunostaining as 0 (no immunostaining), 1 (weak), 2 (moderate), and 3 (strong). Category B documented the percentage of immunoreactive cells as 0 (no immunoreactive cells), 1 (few scattered immunoreactive cells, <1%), 2 (1% to 10%), 3 (11% to 50%), 4 (51% to 80%), and 5 (>80%). The addition of category A and B resulted in an immunoreactivity scoring system ranging from 0 to 8 for each individual case.

### Staining results of E-cadherin

E-cadherin was expressed in 404 of 443 cases (91.2%) in tumor cells. The percentage of stained tumor cells ranged from 0 to 5 (median 4), the staining intensity ranged from 0 to 3 (median 3). The tumor cell IRS ranged from 0 to 8 (median 6). Dichotomized by the median, 119 cases (26.9%) were classified as positive and 324 cases (73.1%) were classified as negative.

### Score distribution for E-cadherin:

| Cases | valid (%)  | missing (%) | Distribution of score [n(%)] |       |         |          |          |           |           |            |            | Median Score | Split at median |                 |
|-------|------------|-------------|------------------------------|-------|---------|----------|----------|-----------|-----------|------------|------------|--------------|-----------------|-----------------|
|       |            |             | 0                            | 1     | 2       | 3        | 4        | 5         | 6         | 7          | 8          |              | negative [n(%)] | positive [n(%)] |
| 482   | 443 (91.9) | 39 (8.1)    | 36 (8.1)                     | 0 (0) | 4 (0.9) | 11 (2.5) | 13 (2.9) | 54 (11.2) | 85 (19.2) | 121 (27.3) | 119 (26.9) | 7            | 324 (73.1)      | 119 (26.9)      |

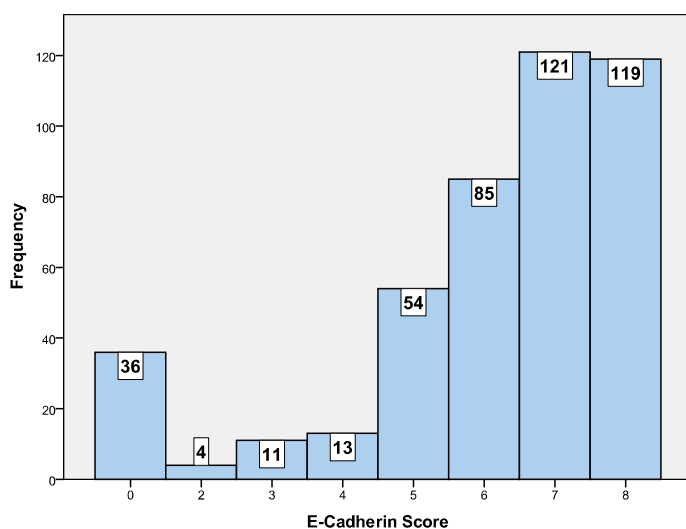

Supplement: MOESM3 [file 8741808]
